# Supplementary figures and images for: Genome-Wide Assessment of Runs of Homozygosity in Chinese Wagyu Beef Cattle
Source: MDPI journal article supplement (doi:10.3390/ani10081425), 2020-08-14

a

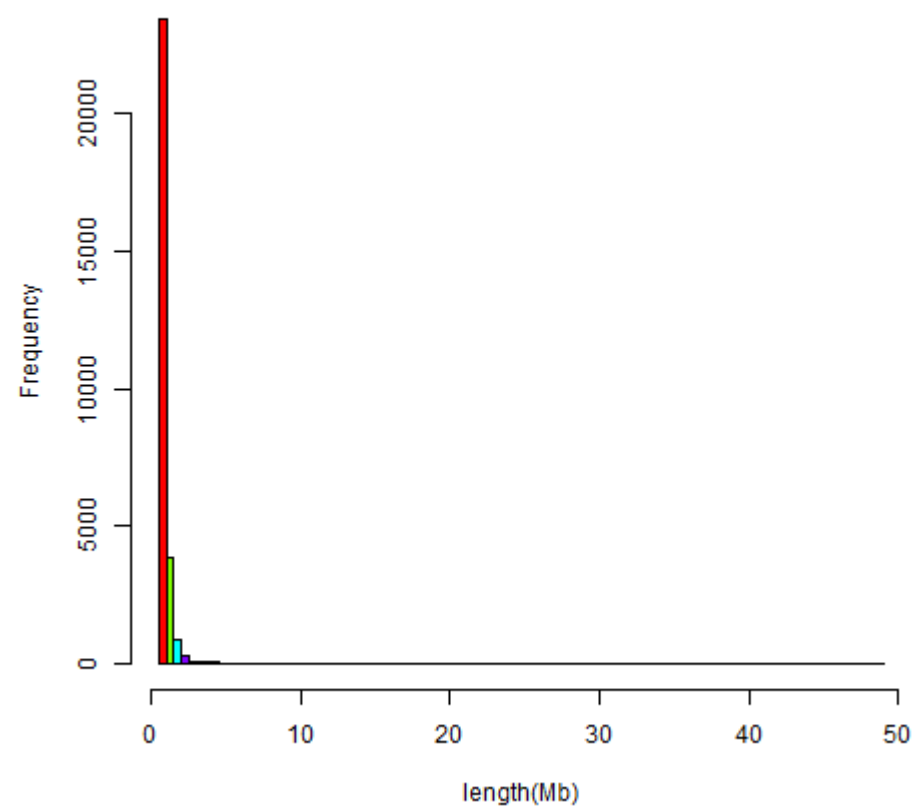

b

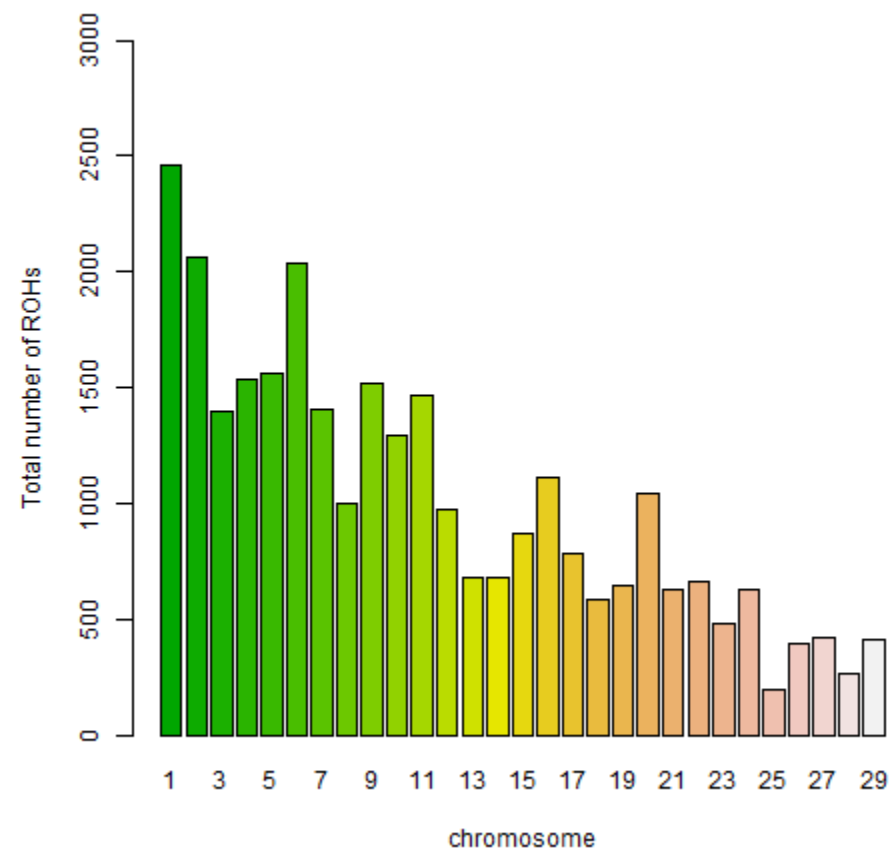

Supplement: s1 [file s1]
